# Supplementary material for: A robust in vitro model for trans-lymphatic endothelial migration
Source: PubMed Central journal article supplement (PMC5431648; doi:10.1038/s41598-017-01575-w), 2017-05-09
Supplement: 41598_2017_1575_MOESM1_ESM.pdf [file 41598_2017_1575_MOESM1_ESM.pdf]

**Title:**

**A robust in vitro model for trans-lymphatic endothelial migration**

**Authors**

Yanbao Xiong<sup>1</sup>, C. Colin Brinkman<sup>1</sup>, Konrad S Famulski<sup>2</sup>, Emmanuel F. Mongodin<sup>3</sup>, Colin J. Lord<sup>4</sup>, Keli L. Hippen<sup>4</sup>, Bruce R. Blazar<sup>4</sup>, and Jonathan S. Bromberg<sup>1,5,6\*</sup>

<sup>1</sup> Center for Vascular and Inflammatory Diseases, University of Maryland School of Medicine

<sup>2</sup> Alberta Transplant Applied Genomics Centre, University of Alberta

<sup>3</sup> Institute for Genome Sciences, University of Maryland School of Medicine

<sup>4</sup> University of Minnesota Cancer Center and the Department of Pediatrics, Division of Blood and Marrow Transplantation, University of Minnesota, Minneapolis, 55455, USA.

<sup>5</sup> Department of Microbiology and Immunology, University of Maryland School of Medicine

<sup>6</sup> Department of Surgery, University of Maryland School of Medicine, Baltimore, Maryland 21201, USA

**Supplementary table 1.** Comparison of gene array data for primary LEC and SVEC4-10.

**Supplementary Table 2. Significant Probe Set Differences Between Primary LEC and SVEC4-10.**

| Probe Set ID | p-value  | adjusted p-value | Gene Accession | Gene Symbol |
|--------------|----------|------------------|----------------|-------------|
| 17283364     | 2.37E-09 | 9.80E-05         | NM_001082976   | Tc2n        |
| 17456934     | 4.25E-08 | 0.000879         | NM_001252292   | Mest        |
| 17359344     | 2.22E-07 | 0.003062         | NM_009848      | Entpd1      |
| 17304523     | 3.61E-07 | 0.003318         | NM_138672      | Stab1       |
| 17279670     | 4.29E-07 | 0.003318         | NM_175930      | Ragef5      |
| 17480880     | 5.05E-07 | 0.003318         | NM_001008548   | Pde2a       |
| 17206471     | 6.27E-07 | 0.003318         | ---            | ---         |
| 17334803     | 6.42E-07 | 0.003318         | NM_028101      | Jmjd8       |
| 17248426     | 1.06E-06 | 0.004887         | NM_011412      | Slit3       |
| 17315133     | 1.29E-06 | 0.005351         | NM_001277255   | Acvrl1      |
| 17239113     | 8.61E-06 | 0.032359         | NM_175155      | Sash1       |
| 17355565     | 1.09E-05 | 0.037647         | NM_001171010   | Slc14a1     |
| 17206479     | 1.24E-05 | 0.039357         | ---            | ---         |
| 17271118     | 1.35E-05 | 0.039857         | NM_145823      | Pitpnc1     |

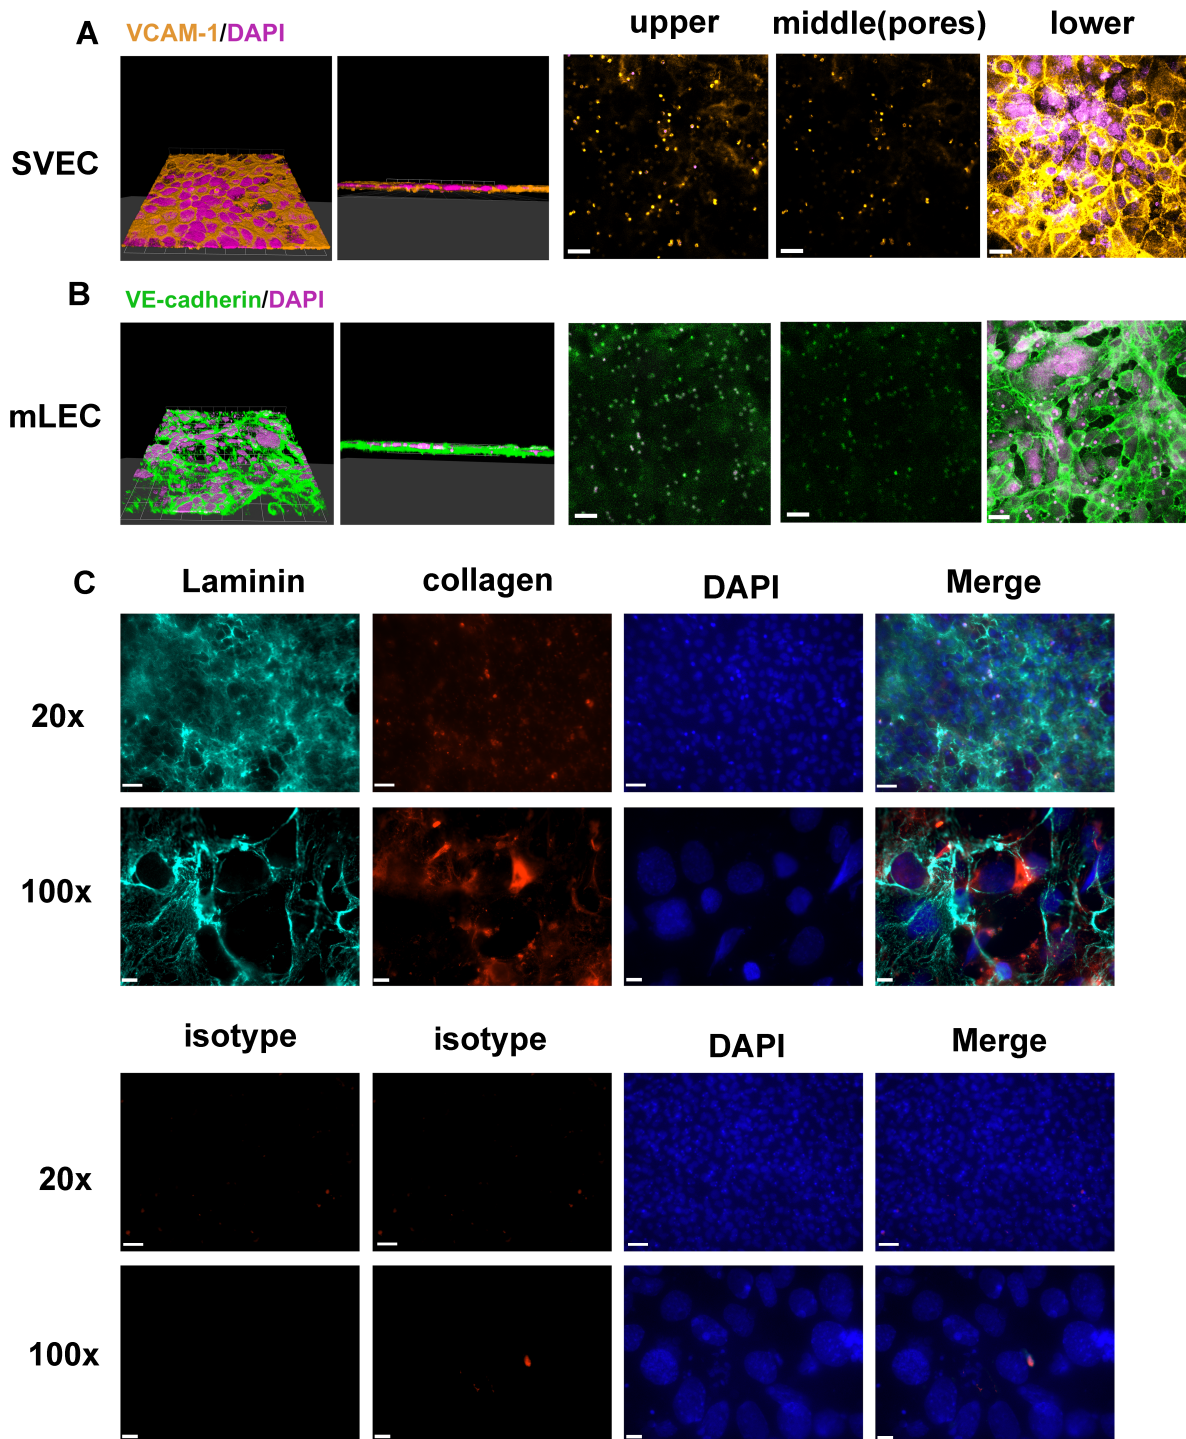

**Supplementary Figure 1.** (A) SVEC on the inserts were stained with DAPI (violet) and phalloidin (gold) and images were captured with z-stack confocal,  $\times 40$ , scale bar  $21 \mu\text{m}$ . (B) Mouse LEC on the inserts were stained with DAPI (violet) and anti-VE-cadherin (green) and

images were captured with z-stack confocal imaging,  $\times 40$ , scale bar  $21\ \mu\text{m}$ . (C) SVEC on the inserts were stained with anti-laminin (cyan), anti-collagen (red) and DAPI (blue) and images were captured fluorescence microscopy,  $\times 20$ , scale bar  $42\ \mu\text{m}$ ;  $\times 100$ , scale bar  $8\ \mu\text{m}$ . Representative of three independent experiments.

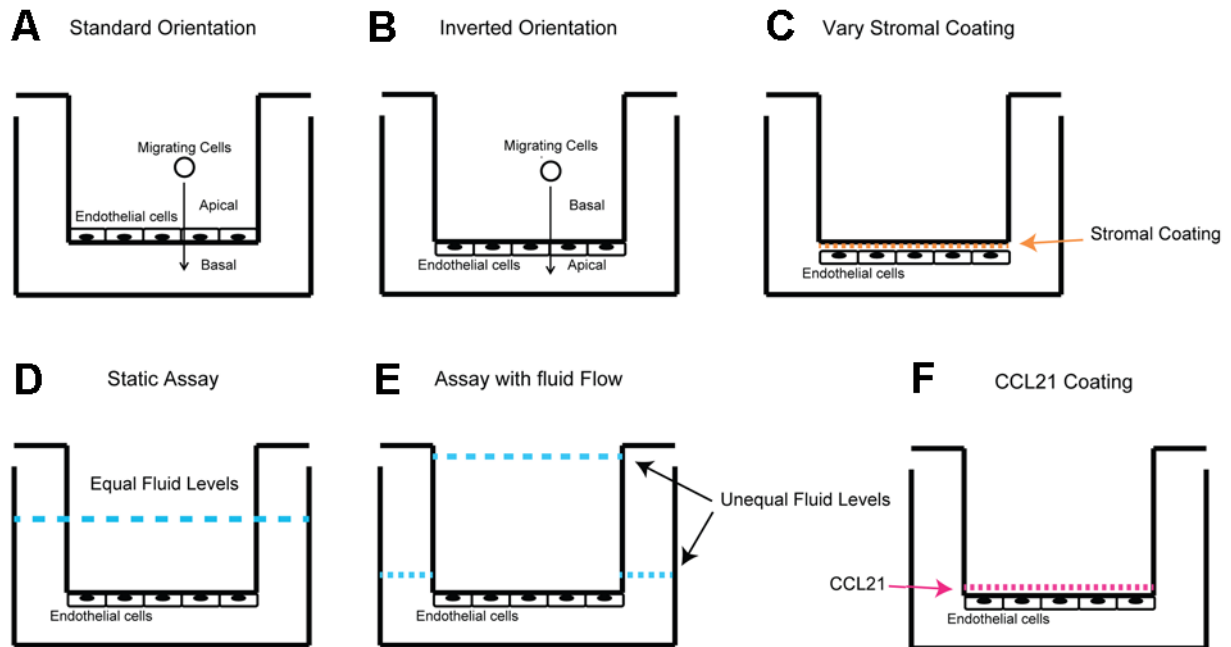

**Supplementary Figure 2.** Diagram for inserts: (A, B) standard orientation of inserts (SVEC or LEC) and inverted orientation insets (iSVEC or iLEC); (C) inserts with various coating on inserts; (D, E) static assay and fluid flow assay; (F) inserts pre-coated with CCL21.

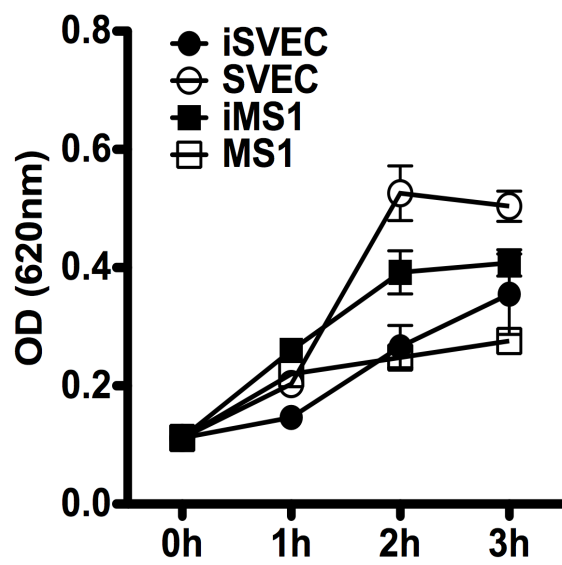

**Supplementary Figure 3. Permeability of different monolayers.** Evans blue dye added to the upper chamber of the transwell assay with different monolayers coated on the inserts; samples collected at the indicated time points from the lower chamber. Representative of three independent experiments.

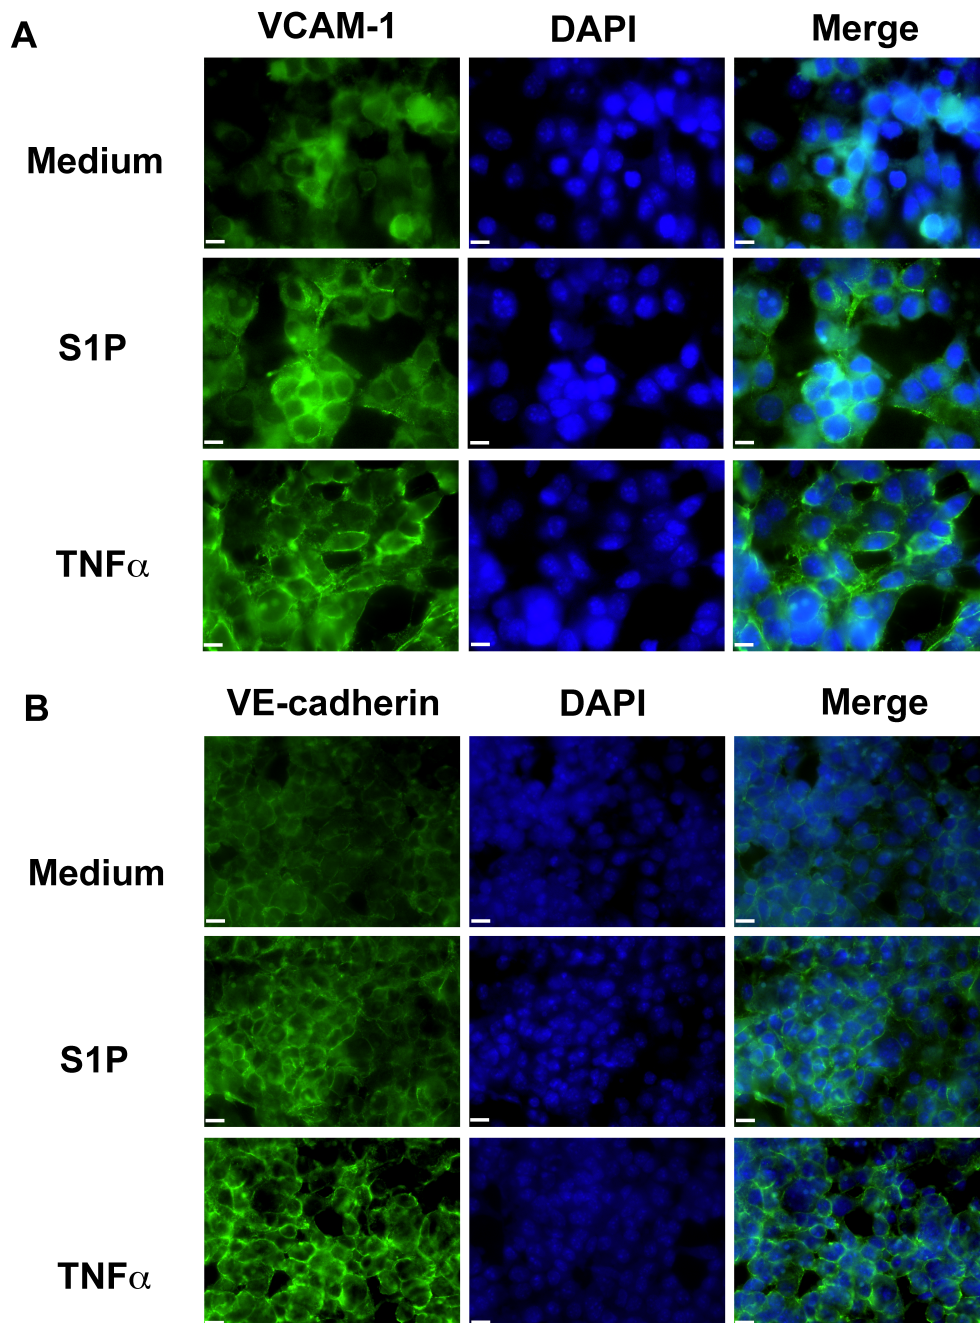

**Supplementary Figure 4.** (A) SVEC on the inserts were stained with DAPI (blue) and anti-VCAM-1 (green) and images were captured with fluorescence microscopy,  $\times 60$ , scale bar  $14 \mu\text{m}$ . (B) SVEC on the inserts were stained with DAPI (blue) and anti-VE-cadherin (green) and images were captured with fluorescence microscopy,  $\times 60$ , scale bar  $14 \mu\text{m}$ . Representative of three independent experiments.

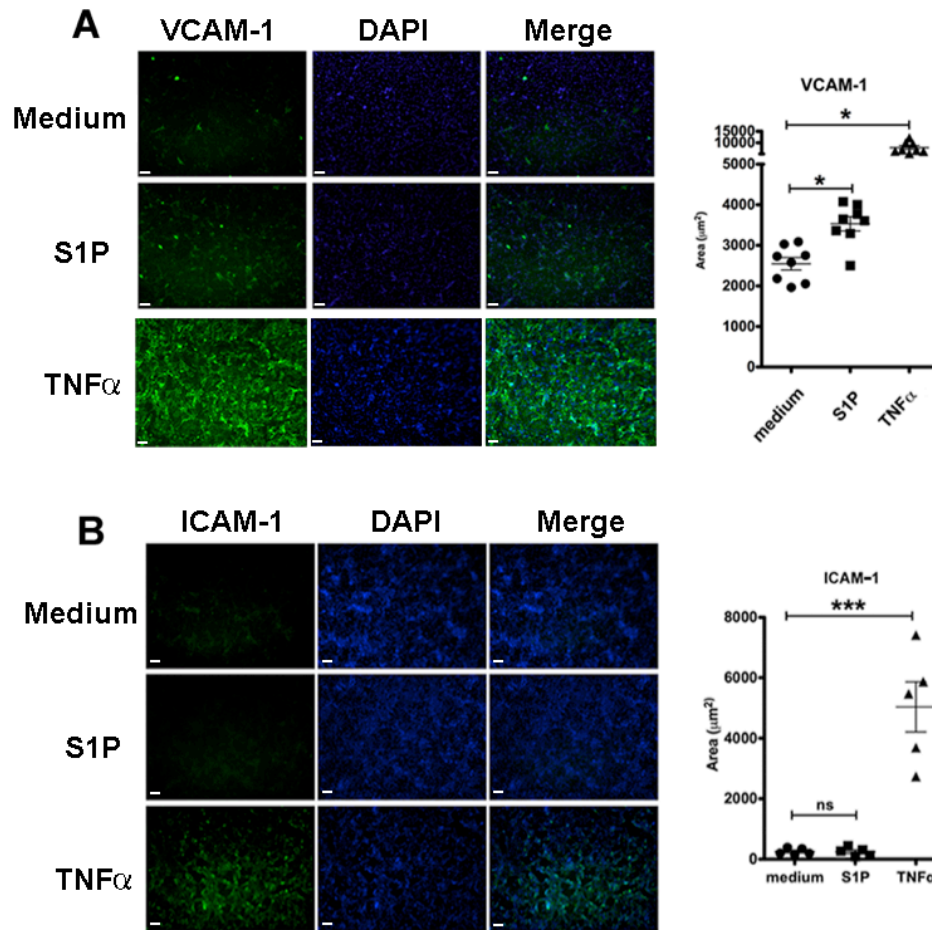

**Supplementary Figure 5.** Fluorescence staining of LEC layers. (A) VCAM-1 expression on mLEC treated with medium, TNF $\alpha$  or S1P and images were captured with fluorescence microscopy,  $\times 10$ , scale bar 80  $\mu\text{m}$ . (B) ICAM-1 expression on SVEC4-10 treated with medium, TNF $\alpha$  or S1P and images were captured with fluorescence microscopy,  $\times 10$ , scale bar 80  $\mu\text{m}$ . Representative of three independent experiments. \* $P < 0.05$ , \*\*\* $P < 0.0001$ .



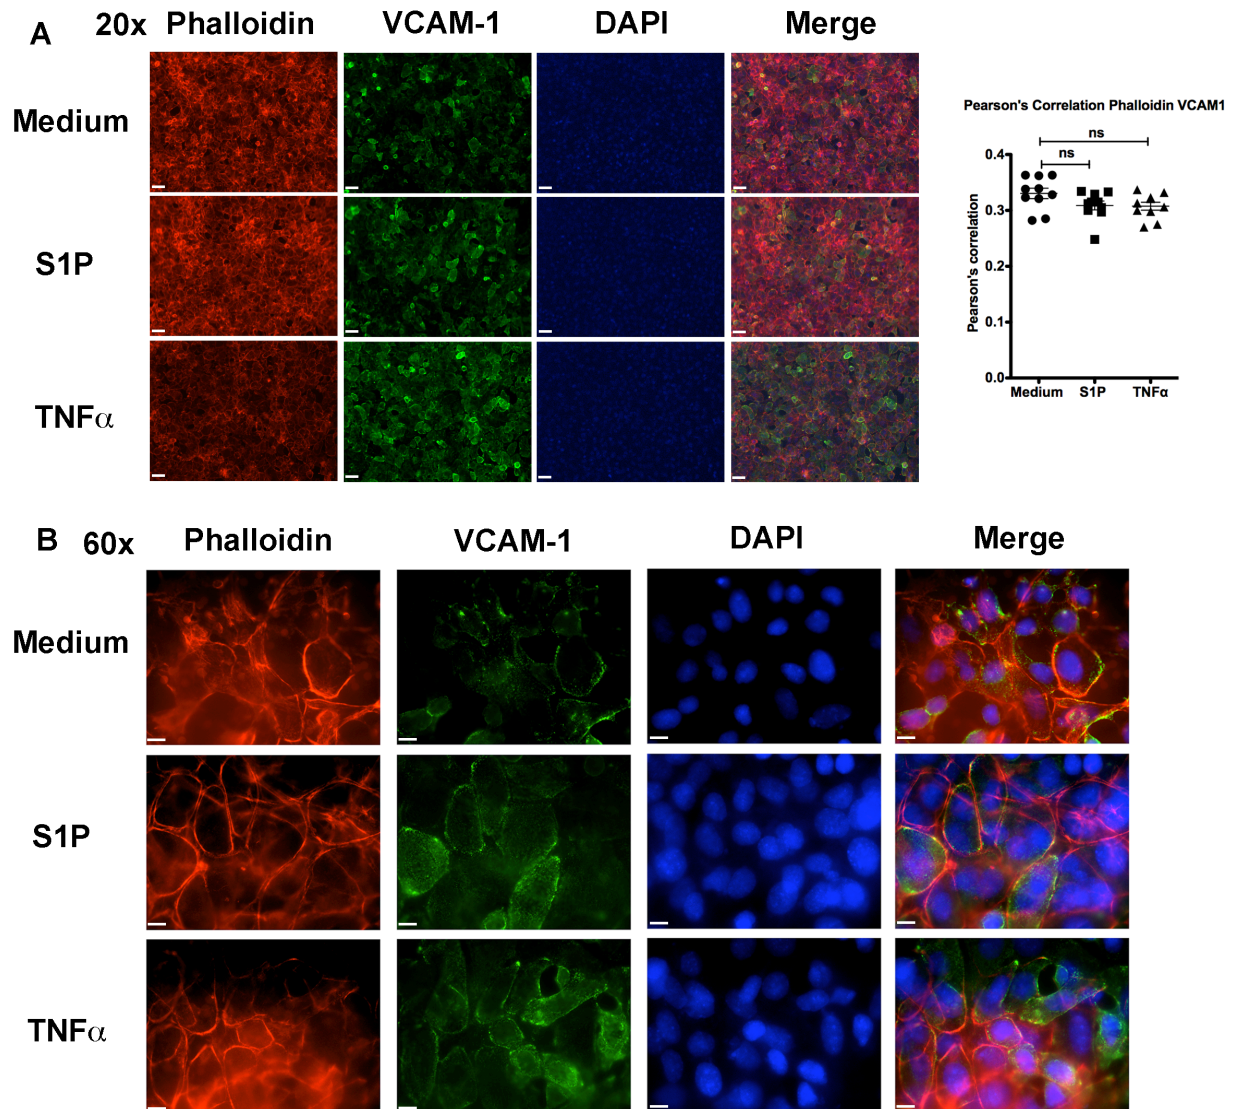

**Supplementary Figure 6.** (A, B) SVEC on the inserts were stained with DAPI (blue), phalloidin (red) and anti-VCAM-1 (green) and images were captured with fluorescence microscopy,  $\times 20$ , scale bar  $42 \mu\text{m}$ ;  $\times 60$ , scale bar  $14 \mu\text{m}$ . Representative of three independent experiments.

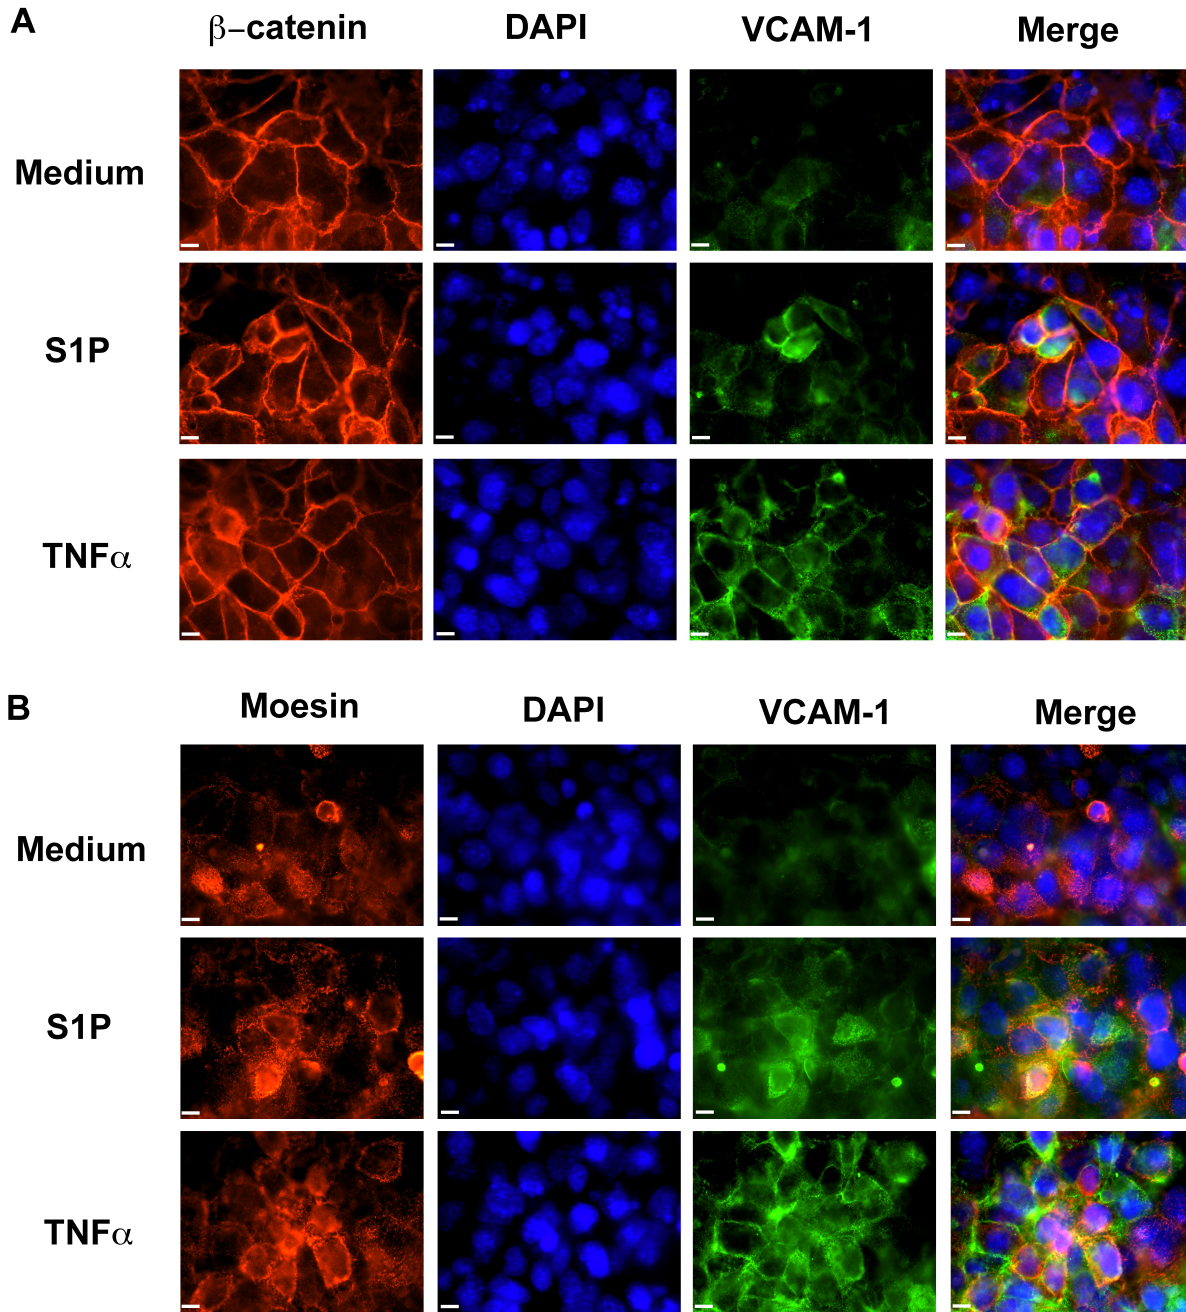

**Supplementary Figure 7.** (A) SVEC on the inserts were stained with DAPI (blue), anti- $\beta$ -catenin (red) and anti-VCAM-1 (green) and images were captured with fluorescence microscopy,  $\times 60$ , scale bar 14  $\mu\text{m}$ . (B) SVEC on the inserts were stained with DAPI (blue), anti-moesin (red) and anti-VCAM-1 (green) and images were captured with fluorescence microscopy,  $\times 60$ , scale bar 14  $\mu\text{m}$ . Representative of three independent experiments.

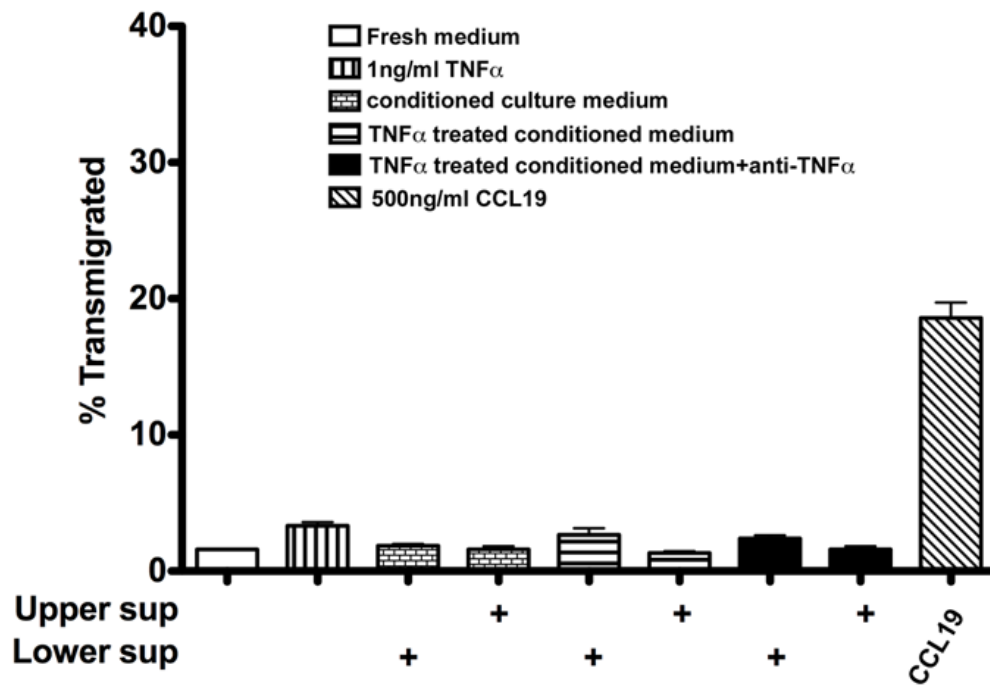

**Supplementary Figure 8.** LEC conditioned medium does not induce CD4 T cell migration. CD4 T cell migration toward LEC conditioned medium or CCL19. Representative of three independent experiments.
